# Supplementary material
Source: PubMed Central journal article supplement (PMC5884687)
Supplement: NIHMS953370-supplement-CTAT_table.pdf [file NIHMS953370-supplement-CTAT_table.pdf]

## Journal of Hepatology

### CTAT methods

Tables for a “Complete, Transparent, Accurate and Timely account” (CTAT) are now mandatory for all revised submissions. The aim is to enhance the reproducibility of methods.

- Only include the parts relevant to your study
- Refer to the CTAT in the main text as ‘Supplementary CTAT Table’
- Do not add subheadings
- Add as many rows as needed to include all information
- Only include one item per row

If the CTAT form is not relevant to your study, please outline the reasons why:

|  |
|--|
|  |
|--|

#### 1.1 Antibodies

| Name                         | Citation | Supplier           | Cat no.     | Clone no. |
|------------------------------|----------|--------------------|-------------|-----------|
| rabbit anti-HO1 Ab           |          | Enzo Life Sciences | ADI-SPA-896 |           |
| rat anti-CD68 Ab             |          | AbD Serotec        | MCA1957     | FA-11     |
| mouse anti-CD68 Ab           |          | BD Biosciences     | 556059      | Y1/82A    |
| rat anti-CD11b Ab            |          | BD Biosciences     | 550282      | M1/70     |
| rat anti-Ly6G Ab             |          | AbD Serotec        | MCA2387     | RB6-8C5   |
| rabbit anti-4HN Ab           |          | abcam              | ab46545     |           |
| Sirt1 Rabbit mAb             |          | Cell signaling     | 9475        | D1D7      |
| p53 Rabbit mAb               |          | Cell signaling     | 2527        | 7F5       |
| p14 ARF Mouse mAb            |          | Cell signaling     | 2407        | 4C6/4     |
| Cleaved Caspase-3 Rabbit mAb |          | Cell signaling     | 9664        | 5A1E      |
| MDM2 Ab                      |          | Santa Cruz         | sc-812      |           |
| β-Actin Ab                   |          | Santa Cruz         | sc-130656   |           |
| HO-1 Ab                      |          | Santa Cruz         | sc-10789    |           |
| p19 ARF Ab                   |          | Santa Cruz         | sc-22784    |           |
| p53 Ab                       |          | Santa Cruz         | sc-6243     |           |
| Phospho-Stat1 Rabbit mAb     |          | Cell signaling     | 7649        | D4A7      |
| Phospho-IκBα Rabbit mAb      |          | Cell signaling     | 2859        | 14D4      |
| IκBα Rabbit mAb              |          | Cell signaling     | 4812        | 44D4      |
| iNOS Rabbit mAb              |          | Cell signaling     | 13120       | D6B6S     |
| Acetyl-p53 Ab                |          | Cell signaling     | 2570        |           |
| Puma Rabbit mAb              |          | Cell signaling     | 14570       | E1S7A     |
| CD206 Ab                     |          | R&D systems        | AF2535      |           |
| IL10 Ab                      |          | abcam              | ab9969      |           |

#### 1.2 Cell lines

| Name | Citation | Supplier | Cat no. | Passage no. | Authentication test method |
|------|----------|----------|---------|-------------|----------------------------|
|      |          |          |         |             |                            |

#### 1.3 Organisms

| Name | Citation | Supplier | Strain | Sex | Age | Overall n number |
|------|----------|----------|--------|-----|-----|------------------|
|      |          |          |        |     |     |                  |

|  |  |  |  |  |  |  |
|--|--|--|--|--|--|--|
|  |  |  |  |  |  |  |
|--|--|--|--|--|--|--|

#### 1.4 Sequence based reagents

| Name          | Cat no.   | Supplier   |
|---------------|-----------|------------|
| SIRT1 siRNA   | sc-40987  | Santa Cruz |
| p19 ARF siRNA | sc-270046 | Santa Cruz |
| p53 siRNA     | sc-29436  | Santa Cruz |

#### 1.5 Biological samples

| Description | Source | Identifier |
|-------------|--------|------------|
|             |        |            |

#### 1.6 Deposited data

| Name of repository | Identifier | Link |
|--------------------|------------|------|
|                    |            |      |

#### 1.7 Software

| Software name | Manufacturer  | Version |
|---------------|---------------|---------|
| JMP           | SAS Institute | 8.0     |

#### 1.8 Other (e.g., drugs, proteins, vectors etc.)

| Reagent             | Cat no.     | Supplier |
|---------------------|-------------|----------|
| Resveratrol         | R5010-100MG | Sigma    |
| Lipopolysaccharides | L5418-2ML   | Sigma    |

#### 1.9 Please provide the details of the corresponding methods author for the manuscript:

|  |
|--|
|  |
|--|
